# Supplementary material for: PO2 oscillations induce lung injury and inflammation
Source: PubMed Central journal article supplement (PMC6438034; doi:10.1186/s13054-019-2401-1), 2019-03-27
Supplement: 13054_2019_2401_MOESM1_ESM.pdf [file 13054_2019_2401_MOESM1_ESM.pdf]

## Additional File 1

### Specific probes und primers used for qRT-PCR

| PCR Probe                      | Oligonukleotidsequence (5'-3')                                                                                                                                | GenBank Nr.  |
|--------------------------------|---------------------------------------------------------------------------------------------------------------------------------------------------------------|--------------|
| <b>iNOS</b>                    | S: 5'-gATggCACCATCATAggggAC-3'<br>A: 5'-ggCACCTgggAACTCAA-3'<br>FL: 5'-TGGAACACCCCAAATACGAGTGGTTCC-FL<br>CY5: L670-GGAGCTGGAGCTGAAGTGGTACGCC-Phos             | NM_001143690 |
| <b>TNF-<math>\alpha</math></b> | S: 5'-CCCAGAAggAAgAgTTTCCA-3'<br>A: 5'-CggCTTTgACATTggCTACA-3'<br>FL: 5'-ggCCCAAggACTCagATCATCgTC-FL<br>CY5: L670-CAAACCTCagATAAgCCCgTCgC-Phos                | NM_214022    |
| <b>IL-1<math>\beta</math></b>  | S: 5'-ACCCTgCagCTggAggAT-3'<br>A: Red-CCTTTggAgTTTCCCAggA-3'                                                                                                  | NM_214321    |
| <b>IL-6</b>                    | S: 5'-CCAATCTgggTTCAATCAggA-3'<br>A: 5'-gTggTggCTTTgTCTggATTC-3'<br>FL: 5'-TgTCgAggCTgTgCagATTAgtACCA-FL<br>CY5: L670-gCACTgATCCAgACCCTgAggCAA-Phos           | NM_214399    |
| <b>PGH2</b>                    | S: 5'-CCCCTTCTgCCTgACgC-3'<br>A: 5'-CTCTgCTCTggTCgATTgAgg-3'<br>FL: 5'-TCTATCTTACTggAACATggCATCACCCA-FL<br>CY5: L670-TTTgTTgAATCATTTAgCAggCAAATTgCT-Phos      | NM_214321    |
| <b>PPIA</b>                    | S: 5'-CTTTCACAgAATAATTCCAaggATT-3'<br>A: 5'-ggACAAGATgCCAaggACC-3'<br>FL: 5'-ATgCTTCAggATAAAAATTCTCATCATCAAA-FL<br>CY5: L670-TTCTCTCCATAgATggACTTgCCACCA-Phos | NM_214353    |

**Table S1: Probes and Primers used for quantitative real-time polymerase chain reaction (qRT-PCR).** S: sense Primer; A: anti-sense Primer; FL: Fluoreszin; CY5: CY5-coupled, Phos: Phosphate; iNOS: Sus scrofa nitric oxide synthase 2, inducible (iNOS), mRNA; TNF- $\alpha$ : Sus scrofa tumor necrosis factor (TNF superfamily, member 2) (TNF- $\alpha$ ), mRNA; IL-1 $\beta$ : Sus scrofa interleukin 1 beta (IL-1 $\beta$ ), mRNA; IL-6: Sus scrofa interleukin 6 (interferon, beta 2) (IL-6), mRNA; PGH2: Sus scrofa prostaglandin G/H synthase-2 (PGH2), mRNA; PPIA: Sus scrofa peptidylprolyl isomerase A (PPIA), mRNA.

| <b>Absolute copy numbers of investigated genes – median (Q1; Q3)</b> |                                                |                                                     |
|----------------------------------------------------------------------|------------------------------------------------|-----------------------------------------------------|
|                                                                      | <b>Control group<br/>(Copy numbers / PPIA)</b> | <b>Intervention group<br/>(Copy numbers / PPIA)</b> |
| <b>TNF-<math>\alpha</math></b>                                       | 0,0217 (0,0164; 0,0258)                        | 0,0385 (0,0264; 0,0434)                             |
| <b>IL-1<math>\beta</math></b>                                        | 0,00232 (0,00184; 0,00260)                     | 0,00523 (0,00441; 0,00998)                          |
| <b>IL-6</b>                                                          | 0,294 (0,215; 0,328)                           | 0,554 (0,457; 0,596)                                |
| <b>iNOS</b>                                                          | 0,000742 (0,000726; 0,000780)                  | 0,002667 (0,001493; 0,001785)                       |
| <b>PGH2</b>                                                          | 0,943 (0,801; 1,087)                           | 1,191 (0,985; 1,354)                                |

**Table S2: Absolute copy numbers of investigated genes by quantitative real-time polymerase chain reaction (qRT-PCR) from lung tissue.** TNF- $\alpha$ : Sus scrofa tumor necrosis factor; IL-1 $\beta$ : Sus scrofa interleukin 1 beta; IL-6: Sus scrofa interleukin 6; iNOS: Sus scrofa nitric oxide synthase 2; PGH2: Sus scrofa prostaglandin G/H synthase-2. Results are presented as median, 25% and 75% quartile (Q1; Q3).
